# Supplementary material for: Mesenchymal stromal cell extracellular vesicles rescue mitochondrial dysfunction and improve barrier integrity in clinically relevant models of ARDS
Source: PubMed Central journal article supplement (PMC8318599; doi:10.1183/13993003.02978-2020), 2021-07-01
Supplement: ERJ-02978-2020.Figure_S1.pdf [file ERJ-02978-2020.Figure_S1.pdf]

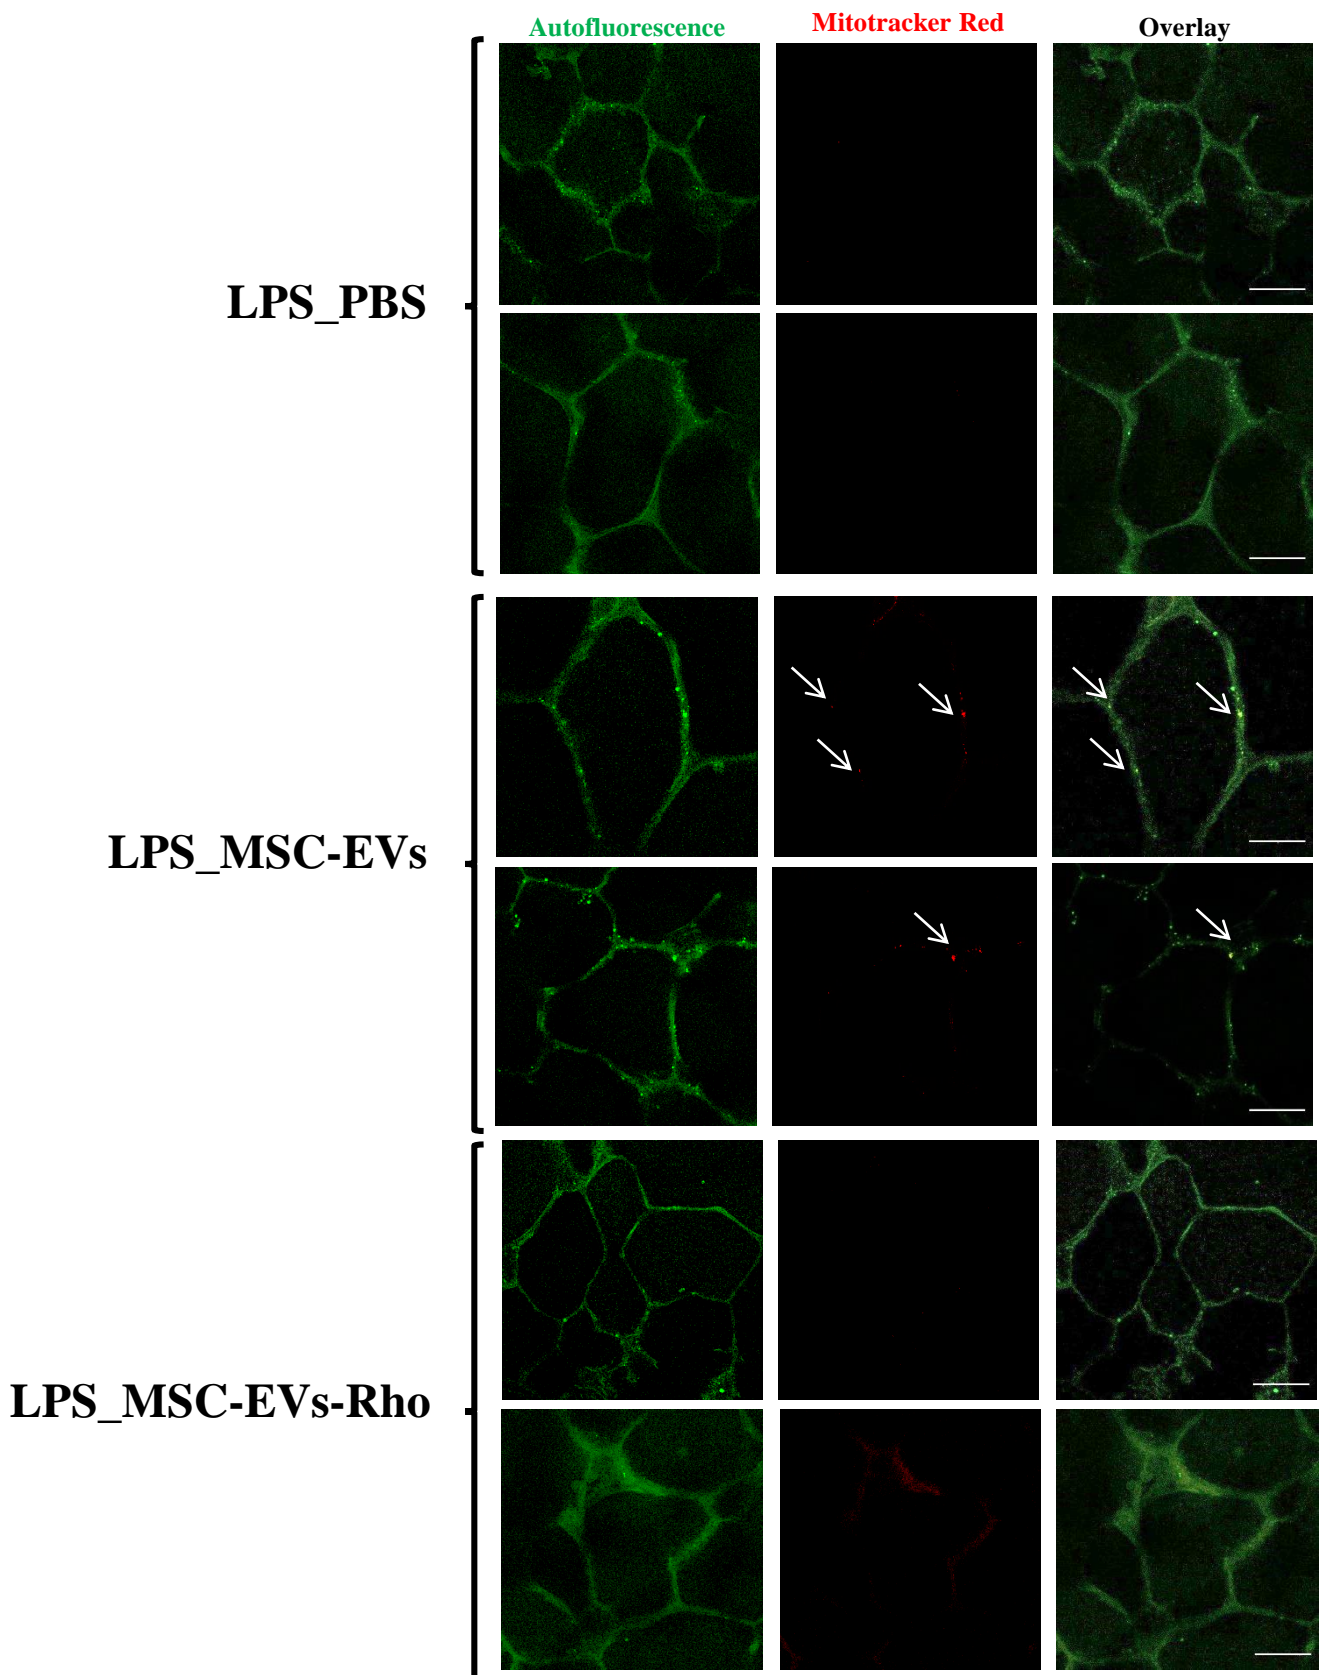

**Supplementary Figure 1. Mitochondrial transfer through MSC-EVs to Human Precision Cut Lung Slices (PCLSs).** Representative confocal images of MSC-EVs mitochondria transfer in PCLSs. PCLSs were stimulated with LPS and treated with PBS, MSCs pre-stained with MitoTracker Deep Red FM or MSC-EVs-Rho for 24 hours to allow EVs uptake. The images were taken using the Leica SP8-Upright Confocal microscopy (scale bars 50  $\mu$ m).
